# Supplementary material for: Mechanism of total saponins of Ranunculus ternatus Thunb. in treatment of breast cancer based on liquid chromatography–mass spectrometry and network analysis
Source: Front Pharmacol. 2025 Apr 25;16:1506885. doi: 10.3389/fphar.2025.1506885 (PMC12062126; doi:10.3389/fphar.2025.1506885)
Supplement: Supplementary file 1 [file Table2.xlsx]

## Sheet: Sheet1
中文名称	Number	Compound	Molecular formula	RT [min]	Ion Mode	Intensity	Theoretical m/z	Observed m/z	Fragment ions	Sort
商陆皂苷元	1	Phytolaccagenin	C31 H48 O7	17.9	+	67200	533.347	533.344	219.1751,95.0857,85.0286,81.0337	Terpenoids and their derivatives (triterpenoid saponins)
积雪草酸	2	Asiatic acid	C30 H48 O5	18.27	+	508000	489.357	489.319	488.3558,469.3346	Terpenoids and their derivatives (triterpenoid saponins)
刺五加苷A	3	Eleutheroside A	C17 H24 O9	4.56	+	85000	373.142	373.143	211.0961,161.0597,85.0284	Terpenoids and their derivatives (triterpenoid saponins)
山栀苷	4	shanzhiside	C16 H24 O11	11.47	-	91000	391.125	391.127	391.1252,229.0720, 113.0233	Terpenoids and their derivatives (triterpenoid saponins)
羟基积雪草酸	5	madecassic acid	C30 H48 O6	22.91	-	417000	503.338	503.338	485.3323 , 201.1642	Terpenoids and their derivatives (triterpenoid saponins)
(-)-穿心莲内酯	6	(-)-Andrographolide	C20 H30 O5	9.31	+	54800	351.217	352.153	107.0857,81.0699,69.0700,67.0544	Terpenes and their derivatives (other triterpenes)
穿心莲内酯	7	Andrographolide	C20 H30 O5	9.99	+	98700	351.217	351.214	81.0702,79.0545,67.0546	Terpenes and their derivatives (other triterpenes)
甜叶菊甙元	8	steviol	C20 H30 O3	14.37	+	57500	319.227	319.227	319.2271,147.1160,119.0855,67.0544	Terpenes and their derivatives (other triterpenes)
短叶松素	9	Pinobanksin	C15H12O5	10.37	+	81700	273.076	273.076	253.0482、185.0610、151.0061、119.0540	Terpenes and their derivatives (diterpenes)
香草醇	10	Vanillyl alcohol	C8 H10 O3	2.19	+	457000	155.07	155.072	109.1014,79.0545,65.0338,55.0181	Terpenes and their derivatives (monoterpenes)
肉桂醛	11	Cinnamaldehyde	C9 H8 O	2.53	+	926000	133.065	133.051	105.0709,79.0551,55.0185	Terpenes and their derivatives (monoterpenes)
香兰素	12	Vanillin	C8 H8 O3	6.21	+	670000	153.055	153.055	125.0600,111.0444,93.0339,79.0546,65.0389	Terpenes and their derivatives (monoterpenes)
对甲氧基肉桂醛	13	4-Methoxycinnamaldehyde	C10 H10 O2	7.4	+	88600	163.075	163.075	163.0752,145.0647,103.0542,91.0544,69.0337	Terpenes and their derivatives (monoterpenes)
地黄苷	14	Rehmapicroside	C16 H26 O8	6.26	-	99700	345.155	345.157	183.1052,165.0915	Terpenes and their derivatives (iridoid glycosides)
报春花根苷	15	primulaverin	C15 H22 O9	3.92	-	287000	345.119	345.114	183.0665, 85.0284，71.0138	Terpenes and their derivatives (iridoid glycosides)
车叶草苷	16	Asperuloside	C18 H22 O11	4.93	-	98500	413.109	413.107	251.0561， 161.0244，71.0138	Terpenes and their derivatives (iridoid glycosides)
苜蓿素	17	Tricin	C17 H14 O7	9.52	+	30500	331.081	331.082	331.0820,95.0497,79.0549	Terpenes and their derivatives (other terpene)
蛇床子素	18	Osthol	C15 H16 O3	9.91	+	33100	245.117	245.117	245.1168,135.0805,67.0544,55.0455	Terpenes and their derivatives (other terpene)
蛇床子苷A	19	Cnidioside A	C17 H20 O9	8.44	+	37800	369.118	369.118	369.1177,181.0863,149.0595,129.0541	Terpenes and their derivatives (other terpene)
熊果苷	20	Arbutin	C12 H16 O7	5.17	-	64400	271.082	271.081	109.0295, 91.0189,89.0243，72.9931,71.0138,59.0138	Terpenes and their derivatives (other terpene)
虎杖甙	21	Piceid	C20 H22 O8	7.54	-	87900	389.124	389.123	227.0710， 185.0608，101.0241,89.0241,71.0137	Terpenes and their derivatives (other terpene)
椴树苷	22	tiliroside	C30 H26 O13	12.32	-	260000	593.13	593.128	447.0936, 285.0405	Terpenes and their derivatives (other terpene)
橙皮甙	23	3',5,7-Trihydroxy-4'-methoxyflavanone	C16 H14 O6	8.58	-	38100	301.072	301.072	301.0717，286.0480，135.0444	Terpenes and their derivatives (other terpene)
连翘酯苷E	24	Forsythoside E	C29H36 O15	4.34	-	94700	623.193	623.195	461.1296 , 113.0233，89.0244，71.0138	Terpenes and their derivatives (other terpene)
异鼠李素	25	Isorhamnetin	C16 H12 O7	4.77	+	96300	317.066	317.064	137.0233,109.0282,97.0284,79.0548	Phenols (flavonoids)
东莨菪素	26	Scopoletin	C10 H8 O4	6.4	+	64200	193.05	193.05	137.0606,133.0293,95.0500,77.0390	Phenols (flavonoids)
柚皮素	27	Naringenin	C15 H12 O5	9.3	-	285000	271.061	271.061	271.0608,151.0037, 119.0502, 107.0139	Phenols (flavonoids)
秦皮素	28	Fraxetin	C10 H8 O5	5.98	-	974000	207.03	207.029	207.0293,192.0065, 164.0116	Phenols (flavonoids)
原儿茶酸	29	Protocatechuic acid	C7 H6 O4	2.59	-	70000	153.019	153.019	153.0194,125.0239,109.0295,108.0215	Phenols (flavonoids)
山奈酚	30	Kaempferol	C15 H10 O6	7.3	-	708000	285.04	285.039	239.0349, 213.0198	Phenols (flavonoids)
大黄酸	31	Rhein	C15 H8 O6	8.27	-	80900	283.025	283.025	255.0299 , 227.0349	Phenols (flavonoids)
肉桂酸	32	Cinnamic acid	C9 H8 O2	9.84	+	99200	149.06	149.096	95.0493,91.054579.0545,65.0387	Phenols (simple phenolic acids)
肉桂酸甲酯	33	Methyl cinnamate	C10 H10 O2	10.24	+	92500	163.075	163.075	131.0491,105.0336,103.0543,95.0492,77.0388	Phenols (simple phenolic acids)
（e）-对香豆酸	34	(E)-p-coumaric acid	C9H8O3	1.89	+	6510000	165.055	165.054	165.0543,57.0337,73.0286,95.0493,123.0442	Phenols (simple phenolic acids)
邻羟基肉桂酸(邻香豆酸)	35	2-Hydroxycinnamic acid	C9 H8 O3	1.89	+	809000	165.055	165.057	123.0442,95.0493,73.0493,57.0337	Phenols (simple phenolic acids)
水杨酸	36	Salicylic acid	C7 H6 O3	7.52	-	9520000	137.024	137.024	137.0245，93.0346，65.0397	Phenols (simple phenolic acids)
对羟基苯甲酸	37	4-Hydroxybenzoic acid	C7 H6 O3	4.5	-	8110000	137.024	137.024	137.0241，136.0165，108.0215，93.0344，81.0345	Phenols (simple phenolic acids)
4－羟基－3－甲氧基苦杏仁酸	38	Vanillyl mandelic acid	C9 H10 O5	3.09	-	748000	197.046	197.045	179.0347,137.0249,123.0450,72.9930	Phenols (simple phenolic acids)
对羟基苯甲醛	39	4-Hydroxybenzaldehyde	C7 H6 O2	5.35	-	1950000	121.029	121.029	121.0293,93.0335	Phenols (simple phenolic acids)
邻苯二酚	40	Catechol	C6 H6 O2	0.19	-	92900	109.029	109.029	109.0293,81.0335	Phenols (simple phenolic acids)
反式阿魏酸	41	(E)-Ferulic acid	C10 H10 O4	5.36	-	99400	193.051	193.052	193.0515,178.0270, 149.0243, 134.0373	Phenols (simple phenolic acids)
5-羟基麦芽酚	42	5-Hydroxymaltol	C6H6O4	3.53	+	921000	143.034	143.034	180.9582/163.0598/127.0386	Other special structures
山梨酸乙酯	43	Ethyl sorbate	C8 H12 O2	4.49	+	77400	141.091	141.054	97.0650,81.0337,67.0544,55.0545	Other special structures
5-羟甲基糠醛	44	Hydroxymethylfurfural	C6 H6 O3	4.77	+	962000	127.039	127.039	127.0391,109.0285,81.0337,53.0388	Other special structures
间苯三酚	45	Phloroglucinol	C6 H6 O3	4.77	+	962000	127.039	127.039	127.0391,109.0285,65.0389	Other special structures
3-正丁烯基苯酞	46	(Z)-3-butylidenephthalide	C12H12O2	4.97	+	89900	189.091	190.086	160.0519,131.0493,91.0543,55.0181	Other special structures
羟甲香豆素	47	hymecromone	C10 H8 O3	5.03	+	60900	177.055	177.055	177.0547,109.0286,95.0493,79.0544	Other special structures
丁苯酞	48	Butylphthalide	C12 H14 O2	12.29	+	97700	191.107	191.09	145.1020,121.0656,95.0449,91.0551,69.0339	Other special structures
D-(+)-苹果酸	49	D-(+)-Malic acid	C4 H6 O5	1.52	-	8900000	133.014	133.014	133.0143,115.0036,89.0244,78.99.1,71.0139	Other special structures
柠檬酸	50	Citric acid	C6 H8 O7	1.84	-	52200000	191.02	191.02	191.0199,111.0087,87.0087,84.0295	Other special structures
丁二酸	51	Succinic acid	C4 H6 O4	2.39	-	673000	117.019	117.019	117.0189,99.0085,73.0293,71.0137,	Other special structures
衣康酸	52	Itaconic acid	C5 H6 O4	1.87	-	82500	129.019	129.019	128.0352，111.0085，85.0294,71.0138	Other special structures
D-甘露糖醇	53	D-(-)-Mannitol	C6 H14 O6	7.55	-	918000	181.072	181.071	163.0613，145.0507，89.0243，71.0138，59.0137	Other special structures
